# Supplementary material for: Length-Dependent Transition from Extended to Folded Shapes in Short Oligomers of an Azetidine-Based α-Amino Acid: The Critical Role of NH···N H-Bonds
Source: MDPI journal article supplement (doi:10.3390/molecules28135048), 2023-06-28

# Length-dependent transition from extended to folded shapes in short oligomers of an azetidine-based $\alpha$ -amino acid: the critical role of $\text{NH}\cdots\text{N}$ H-bonds

Dayi Liu <sup>1,†</sup>, Jean-Xavier Bardaud <sup>2,†,§</sup>, Zeynab Imani <sup>1</sup>, Sylvie Robin <sup>1,3</sup>, Eric Gloaguen <sup>2,§</sup>, Valérie Brenner <sup>2,#</sup>, David J. Aitken <sup>1,\*</sup> and Michel Mons <sup>2,\*</sup>

<sup>1</sup> Université Paris-Saclay, CNRS, ICMO, 91400 Orsay, France.

<sup>2</sup> Université Paris-Saclay, CEA, CNRS, LIDYL, 91191 Gif-sur-Yvette, France.

<sup>3</sup> Université Paris Cité, Faculté de Pharmacie, 75006 Paris, France.

† Shared first-authorship

§ New address: Université Paris-Saclay, CNRS, ISMO, 91400 Orsay, France

# New address: CEA Paris-Saclay, Direction de la Recherche Fondamentale

\* Correspondence: DJA: [david.aitken@universite-paris-saclay.fr](mailto:david.aitken@universite-paris-saclay.fr); MM: [michel.mons@cea.fr](mailto:michel.mons@cea.fr)

## Table of contents

|                                                                                            |    |
|--------------------------------------------------------------------------------------------|----|
| S1. Gas phase quantum chemistry modeling .....                                             | 2  |
| ___ S1.1 Relevant gas phase structures of compounds <b>1-3</b> .....                       | 2  |
| ___ S1.2. Gas phase structure of the most stable helical conform. of compound <b>3</b> ... | 7  |
| ___ S1.3. Temperature dependence of gas phase energetics of compound <b>3</b> .....        | 7  |
| S2. Gas phase spectroscopy of compound <b>3</b> .....                                      | 8  |
| S3. Solution phase modeling .....                                                          | 10 |
| ___ S3.1 Relevant quantum chemistry conformations of compounds <b>1-3</b> .....            | 10 |
| ___ S3.2. Solution phase IR spectra and theoretical modeling .....                         | 16 |
| S4. Cbz-(Attc) <sub>n</sub> -NHMe compounds in solution .....                              | 17 |
| ___ S4.1. Theoretical landscapes of Cbz-(Attc) <sub>n</sub> -NHMe in solution.....         | 17 |
| ___ S4.2. IR in solution: experiment and theoretical modeling .....                        | 18 |
| S5. Solution phase spectroscopy of compounds <b>1-3</b> .....                              | 19 |
| ___ S5.1 IR spectroscopy dilution experiments.....                                         | 19 |
| ___ S5.2 <sup>1</sup> H NMR chemical shifts of NH signals.....                             | 20 |
| ___ S5.3 <sup>1</sup> H NMR DMSO- <i>d</i> <sub>6</sub> titration experiments .....        | 21 |

## S1. Gas phase quantum chemistry modeling

### S1.1 Relevant gas phase structures of compounds 1-3

Listed below, in a xyz format, are the most relevant gas phase structures of compounds 1-3, shown in Figure 2, at the RI-B97-D3 (BJ-abc)/def2-TZVPPD level of theory.

Compound 1: conformation 5<sup>O</sup>-6<sub>γ</sub> (g+)

|   |          |          |          |
|---|----------|----------|----------|
| C | 0.91305  | -1.43128 | -4.75172 |
| O | 0.97728  | -2.27584 | -3.87027 |
| N | 1.75634  | -1.31512 | -5.80898 |
| C | 2.87737  | -2.16354 | -6.07304 |
| C | 3.52545  | -1.64583 | -7.37663 |
| O | 3.07101  | -0.67488 | -7.98192 |
| N | 4.61056  | -2.33867 | -7.78279 |
| O | -0.04364 | -0.45604 | -4.82438 |
| C | -0.95634 | -0.37715 | -3.69098 |
| C | 5.34299  | -1.98151 | -8.98519 |
| C | 2.69006  | -3.71339 | -6.07325 |
| N | 4.01271  | -3.83263 | -5.40818 |
| C | 3.92615  | -2.42377 | -4.94618 |
| H | 1.61876  | -0.57164 | -6.48534 |
| H | 4.90271  | -3.12143 | -7.20110 |
| H | 5.75940  | -0.97142 | -8.90667 |
| H | 4.68872  | -2.00792 | -9.86260 |
| H | 6.15709  | -2.69523 | -9.12270 |
| H | 1.85649  | -3.99984 | -5.42182 |
| H | 2.61422  | -4.21369 | -7.04426 |
| H | 4.86579  | -1.86334 | -4.98918 |
| H | 3.46117  | -2.32584 | -3.95833 |
| C | 4.16457  | -4.86261 | -4.39486 |
| H | 3.38597  | -4.79833 | -3.61484 |
| H | 5.14598  | -4.76636 | -3.91863 |
| H | 4.10932  | -5.85030 | -4.86450 |
| H | -1.87518 | 0.02763  | -4.12005 |
| H | -1.13597 | -1.38635 | -3.31471 |
| C | -0.41946 | 0.52455  | -2.61231 |
| C | 0.36355  | 0.00744  | -1.57234 |
| H | 0.57418  | -1.05702 | -1.54859 |
| C | 0.87737  | 0.85287  | -0.58923 |
| H | 1.48271  | 0.44209  | 0.21432  |
| C | 0.61389  | 2.22327  | -0.63396 |
| H | 1.01285  | 2.88060  | 0.13373  |
| C | -0.16760 | 2.74641  | -1.66554 |
| H | -0.37983 | 3.81133  | -1.70254 |
| C | -0.68002 | 1.89958  | -2.64794 |
| H | -1.28918 | 2.30657  | -3.45169 |

Compound 2: conformation 5<sup>O</sup>-6 $\gamma$ /5<sup>O</sup>-6 $\gamma$  (g+)

|   |            |            |            |     |
|---|------------|------------|------------|-----|
| C | 1.7607332  | -0.4737004 | -2.822154  | 81  |
| C | 2.9521208  | -1.4443056 | -2.9757286 | 82  |
| O | 3.2035636  | -2.2977574 | -2.1266008 | 83  |
| N | 3.6774352  | -1.2734754 | -4.1033385 | 84  |
| C | 4.8343206  | -2.0987602 | -4.4027996 | 85  |
| C | 2.1524612  | 1.0091281  | -3.1121188 | 86  |
| N | 1.7245954  | 0.8055437  | -4.5194901 | 87  |
| C | 0.9039182  | -0.3661292 | -4.1224146 | 88  |
| H | 3.381773   | -0.5360267 | -4.7384249 | 89  |
| H | 4.5518987  | -3.1525912 | -4.4985906 | 90  |
| H | 5.5835292  | -2.0231534 | -3.6078717 | 91  |
| H | 5.2720504  | -1.7578188 | -5.3427082 | 92  |
| H | 1.5027792  | 1.6980301  | -2.5608641 | 93  |
| H | 3.204611   | 1.2846249  | -2.9849635 | 94  |
| H | 0.9385823  | -1.2112115 | -4.8179991 | 95  |
| H | -0.1328068 | -0.103306  | -3.8842606 | 96  |
| C | 1.0489441  | 1.9063683  | -5.1848456 | 97  |
| H | 0.1814033  | 2.2731336  | -4.6093787 | 98  |
| H | 0.702546   | 1.5805314  | -6.1711716 | 99  |
| H | 1.7506697  | 2.7347014  | -5.327418  | 100 |
| C | -2.3243845 | -0.1326876 | 1.794368   | 101 |
| O | -2.1251295 | -0.9681406 | 2.6631431  | 102 |
| N | -1.5928665 | 0.040837   | 0.6648243  | 103 |
| C | -0.4522346 | -0.7361592 | 0.2838116  | 104 |
| C | 0.0276035  | -0.1753358 | -1.0748478 | 105 |
| O | -0.5624268 | 0.7640994  | -1.6154336 | 106 |
| N | 1.1137938  | -0.7966406 | -1.5833912 | 107 |
| O | -3.349251  | 0.7770451  | 1.8128763  | 108 |
| C | -4.1525999 | 0.7996224  | 3.0272305  | 109 |
| C | -0.5465219 | -2.2945448 | 0.290534   | 110 |
| N | 0.8294816  | -2.3291906 | 0.8319885  | 111 |
| C | 0.7156306  | -0.9313342 | 1.3012978  | 112 |
| H | -1.8479588 | 0.7704203  | 0.0083164  | 113 |
| H | 1.5290736  | -1.5691407 | -1.0523124 | 114 |
| H | -1.3064849 | -2.6298205 | 1.006738   | 115 |
| H | -0.6747168 | -2.7973914 | -0.6744197 | 116 |
| H | 1.6154289  | -0.3222206 | 1.1604096  | 117 |
| H | 0.3480068  | -0.843302  | 2.331253   | 118 |
| C | 1.1751216  | -3.3589377 | 1.7906485  | 119 |
| H | 0.4937688  | -3.3762688 | 2.660323   | 120 |
| H | 2.1967107  | -3.1942715 | 2.1487644  | 121 |
| H | 1.1439336  | -4.3376541 | 1.3007748  | 122 |
| H | -5.1293907 | 1.1534367  | 2.6904701  | 123 |
| H | -4.2386829 | -0.2190675 | 3.4106333  | 124 |
| C | -3.5674707 | 1.7261562  | 4.0591305  | 125 |
| C | -2.6900592 | 1.2428539  | 5.0378158  | 126 |
| H | -2.4397081 | 0.1867082  | 5.0480208  | 127 |
| C | -2.1335561 | 2.1110574  | 5.9768681  | 128 |
| H | -1.4548097 | 1.7260712  | 6.733136   | 129 |
| C | -2.4474752 | 3.4711073  | 5.948115   | 130 |
| H | -2.0150164 | 4.1461476  | 6.6815764  | 131 |
| C | -3.3222142 | 3.961082   | 4.9767391  | 132 |
| H | -3.5736246 | 5.0178528  | 4.9525309  | 133 |
| C | -3.8775196 | 3.0913581  | 4.0388967  | 134 |
| H | -4.5595791 | 3.4724269  | 3.2823115  | 135 |

Compound 3: 5<sup>o</sup>-6 $\gamma$ /5<sup>o</sup>-6 $\gamma$ /5<sup>o</sup>-6 $\gamma$  (g+)

|   |            |            |            |
|---|------------|------------|------------|
| C | -0.0875595 | 0.1336363  | 2.7871424  |
| N | 0.0837614  | -0.4353398 | 4.0009555  |
| C | 0.3078286  | 0.2679375  | 5.2301085  |
| C | 0.4814179  | -0.7975360 | 6.3360651  |
| O | 0.4187834  | -2.0007124 | 6.0885623  |
| N | 0.7016809  | -0.2974304 | 7.5719106  |
| C | 0.8818187  | -1.1595277 | 8.7270646  |
| C | -0.6735742 | 1.4084660  | 5.6447492  |
| N | 0.4950123  | 2.1812628  | 6.1346550  |
| C | 1.4098525  | 1.3723124  | 5.2897246  |
| H | 0.0584127  | -1.4579583 | 4.0716714  |
| H | 0.7335506  | 0.7153187  | 7.6622413  |
| H | 1.7491300  | -1.8150897 | 8.5958954  |
| H | 0.0027226  | -1.7933740 | 8.8834894  |
| H | 1.0349752  | -0.5341386 | 9.6085074  |
| H | -1.1456012 | 1.8548945  | 4.7622864  |
| H | -1.4229761 | 1.1722228  | 6.4072008  |
| H | 2.3613730  | 1.1069638  | 5.7627047  |
| H | 1.5788260  | 1.8091118  | 4.2991770  |
| C | 0.4871030  | 3.6199936  | 5.9375029  |
| H | 0.3203370  | 3.8985418  | 4.8825713  |
| H | 1.4448876  | 4.0393042  | 6.2628982  |
| H | -0.3044519 | 4.0682917  | 6.5471418  |
| C | -0.3032637 | -0.8739086 | 1.6353946  |
| O | -0.0808748 | 1.3475804  | 2.5724199  |
| C | 0.7079467  | -2.0631125 | 1.6736558  |
| N | -0.2878185 | -2.8251751 | 2.4574355  |
| C | -1.3807287 | -1.9514396 | 1.9802054  |
| H | 0.8728163  | -2.4646945 | 0.6663033  |
| H | 1.6641558  | -1.8945134 | 2.1817602  |
| H | -2.1254785 | -1.6891393 | 2.7394933  |
| H | -1.8676035 | -2.3190402 | 1.0690712  |
| C | -0.3965816 | -4.2534195 | 2.2390004  |
| H | -0.5599305 | -4.5070957 | 1.1763729  |
| H | -1.2312235 | -4.6489081 | 2.8271745  |
| H | 0.5195569  | -4.7452093 | 2.5818608  |
| C | -1.0671893 | 0.3332611  | -4.3728221 |
| O | -0.9919540 | 1.5258378  | -4.6274803 |
| N | -0.9501402 | -0.2346156 | -3.1461871 |
| C | -0.7212364 | 0.4681335  | -1.9202645 |
| C | -0.6418682 | -0.6053155 | -0.8085063 |
| O | -0.7577238 | -1.8036200 | -1.0775591 |
| N | -0.4375692 | -0.1073783 | 0.4298295  |
| O | -1.3008044 | -0.6459468 | -5.3026075 |
| C | -1.3167970 | -0.2094091 | -6.6912670 |
| C | -1.6445121 | 1.6663923  | -1.5390692 |
| N | -0.4467233 | 2.3714809  | -1.0313860 |
| C | 0.4436252  | 1.5035636  | -1.8342506 |
| H | -1.0093753 | -1.2426929 | -3.0507157 |
| H | -0.3562632 | 0.9084831  | 0.5390347  |
| H | -2.0728495 | 2.1253060  | -2.4386946 |
| H | -2.4243059 | 1.4842675  | -0.7913774 |
| H | 1.3617723  | 1.1878227  | -1.3266006 |
| H | 0.6727956  | 1.9114744  | -2.8265272 |
| C | -0.3603302 | 3.8062506  | -1.2146841 |
| H | -0.4806891 | 4.1061706  | -2.2713143 |
| H | 0.6118700  | 4.1617739  | -0.8579117 |
| H | -1.1380614 | 4.2970121  | -0.6203008 |
| H | -1.9919911 | -0.9131377 | -7.1832125 |
| H | -1.7348178 | 0.7984126  | -6.7378366 |
| C | 0.0592962  | -0.2651480 | -7.2989381 |
| C | 0.8972805  | 0.8567984  | -7.2740060 |
| H | 0.5385750  | 1.7735478  | -6.8166216 |
| C | 2.1810709  | 0.7908528  | -7.8155427 |
| H | 2.8225555  | 1.6675074  | -7.7923016 |
| C | 2.6411407  | -0.3967891 | -8.3876399 |
| H | 3.6404141  | -0.4466644 | -8.8113917 |
| C | 1.8117883  | -1.5196019 | -8.4172323 |
| H | 2.1635726  | -2.4454356 | -8.8639928 |
| C | 0.5284837  | -1.4513877 | -7.8755587 |
| H | -0.1170442 | -2.3262792 | -7.8986502 |

140  
141  
142  
143  
144  
145  
146  
147  
148  
149  
150  
151  
152  
153  
154  
155  
156  
157  
158  
159  
160  
161  
162  
163  
164  
165  
166  
167  
168  
169  
170  
171  
172  
173  
174  
175  
176  
177  
178  
179  
180  
181  
182  
183  
184  
185  
186  
187  
188  
189  
190  
191  
192  
193  
194  
195  
196  
197  
198  
199  
200  
201  
202  
203  
204  
205  
206  
207  
208  
209  
210  
211  
212  
213  
214  
215

Compound 3: 5<sup>O</sup>-6γ<sup>N</sup>-π<sub>am</sub>/5<sup>O</sup>-6γ (g+)

|   |            |            |            |
|---|------------|------------|------------|
| C | 0.3380347  | -0.4788269 | 3.1650906  |
| N | -0.4129237 | -1.4253931 | 2.5526524  |
| C | -0.3189538 | -2.8414185 | 2.7281355  |
| C | -1.2866919 | -3.4736081 | 1.7026760  |
| O | -1.9328621 | -2.7786827 | 0.9148913  |
| N | -1.3565726 | -4.8195277 | 1.7426616  |
| C | -2.1895995 | -5.5768774 | 0.8244105  |
| C | 1.0851128  | -3.5229946 | 2.7113045  |
| N | 0.6138083  | -4.4161927 | 3.8011892  |
| C | -0.4574437 | -3.4500037 | 4.1554503  |
| H | -1.0113679 | -1.1563230 | 1.7782746  |
| H | -0.7494320 | -5.2891983 | 2.4111291  |
| H | -3.2207390 | -5.2127848 | 0.8539815  |
| H | -1.8295614 | -5.4869259 | -0.2067345 |
| H | -2.1702986 | -6.6273292 | 1.1201546  |
| H | 1.8608546  | -2.8187494 | 3.0316701  |
| H | 1.3853075  | -4.0329951 | 1.7903003  |
| H | -1.4188450 | -3.9022613 | 4.4214952  |
| H | -0.1480907 | -2.7227237 | 4.9150566  |
| C | 1.5652454  | -4.7853872 | 4.8347838  |
| H | 2.0400022  | -3.9059861 | 5.3028038  |
| H | 1.0553678  | -5.3639103 | 5.6123725  |
| H | 2.3488428  | -5.4155561 | 4.4009345  |
| C | 0.0689923  | 0.9530146  | 2.6708717  |
| O | 1.1252546  | -0.6944764 | 4.0832886  |
| C | 1.2267572  | 1.9664260  | 2.8750993  |
| N | 0.2556766  | 2.9309472  | 3.4485243  |
| C | -0.7104119 | 1.8419907  | 3.6784214  |
| H | 1.7386029  | 2.3027873  | 1.9707471  |
| H | 1.9476106  | 1.5822482  | 3.6084351  |
| H | -0.6604957 | 1.4144573  | 4.6917208  |
| H | -1.7527883 | 2.0758575  | 3.4277308  |
| C | 0.6774188  | 3.7073261  | 4.5962811  |
| H | -0.1657354 | 4.2959299  | 4.9745063  |
| H | 1.0639853  | 3.0783022  | 5.4215368  |
| H | 1.4673256  | 4.4036767  | 4.2957109  |
| C | -0.0112519 | 0.6133175  | -3.4714992 |
| O | -1.0221829 | 1.0835841  | -3.9703723 |
| N | 0.2590718  | 0.5172328  | -2.1449443 |
| C | -0.6000144 | 0.9485094  | -1.0856195 |
| C | 0.1574139  | 0.6786793  | 0.2308616  |
| O | 1.2879960  | 0.1953339  | 0.2452984  |
| N | -0.5294929 | 1.0125791  | 1.3516401  |
| O | 1.0327976  | 0.0826692  | -4.1823288 |
| C | 0.9760226  | 0.2678974  | -5.6252761 |
| C | -1.2129052 | 2.3843800  | -1.1178867 |
| N | -2.4670205 | 1.8130431  | -0.5642401 |
| C | -2.0797106 | 0.4557717  | -1.0347997 |
| H | 1.1481554  | 0.1356184  | -1.8412688 |
| H | -1.4351181 | 1.4623182  | 1.2119012  |
| H | -1.3188218 | 2.7329306  | -2.1516938 |
| H | -0.7393735 | 3.1515684  | -0.4959720 |
| H | -2.3191980 | -0.3647555 | -0.3531649 |
| H | -2.4426979 | 0.2372032  | -2.0459735 |
| C | -3.7254098 | 2.3606415  | -1.0380748 |
| H | -3.7989209 | 2.3503354  | -2.1395610 |
| H | -4.5556414 | 1.7770068  | -0.6268566 |
| H | -3.8296030 | 3.3938614  | -0.6901676 |
| H | -0.0669108 | 0.2219060  | -5.9454875 |
| H | 1.5240755  | -0.5882706 | -6.0247820 |
| C | 1.6224076  | 1.5647953  | -6.0324466 |
| C | 3.0042417  | 1.6263175  | -6.2496274 |
| H | 3.6017751  | 0.7238802  | -6.1449778 |
| C | 3.6166319  | 2.8307710  | -6.5945150 |
| H | 4.6895736  | 2.8655772  | -6.7619699 |
| C | 2.8492831  | 3.9896864  | -6.7264498 |
| H | 3.3239453  | 4.9290365  | -6.9964378 |
| C | 1.4703008  | 3.9371709  | -6.5138242 |
| H | 0.8696634  | 4.8366450  | -6.6180376 |
| C | 0.8596963  | 2.7312867  | -6.1687343 |
| H | -0.2101649 | 2.6866400  | -5.9902700 |

216  
217  
218  
219  
220  
221  
222  
223  
224  
225  
226  
227  
228  
229  
230  
231  
232  
233  
234  
235  
236  
237  
238  
239  
240  
241  
242  
243  
244  
245  
246  
247  
248  
249  
250  
251  
252  
253  
254  
255  
256  
257  
258  
259  
260  
261  
262  
263  
264  
265  
266  
267  
268  
269  
270  
271  
272  
273  
274  
275  
276  
277  
278  
279  
280  
281  
282  
283  
284  
285  
286  
287  
288  
289  
290

Compound 3: f<sup>N</sup>-π<sub>am</sub><sup>N</sup>-10<sup>N</sup>-10 (g<sup>+</sup>)

|   |            |            |            |
|---|------------|------------|------------|
| C | 0.9241170  | -0.8347466 | -1.4998513 |
| N | 0.4742507  | 0.4262449  | -1.2830241 |
| C | 0.6788007  | 1.4815387  | -2.2567723 |
| C | 2.1504587  | 1.9051547  | -2.4183625 |
| O | 2.5014867  | 2.5860109  | -3.3799209 |
| N | 2.9794969  | 1.5589510  | -1.4073703 |
| C | 4.3930073  | 1.8879409  | -1.4471433 |
| C | -0.1110320 | 1.2767470  | -3.5755641 |
| N | -1.2008023 | 2.1356138  | -3.0433625 |
| C | -0.2833902 | 2.6777479  | -2.0183166 |
| H | 0.0074778  | 0.6595586  | -0.4147990 |
| H | 2.6586245  | 0.9361275  | -0.6772157 |
| H | 4.9056598  | 1.3467726  | -2.2512092 |
| H | 4.5297120  | 2.9588932  | -1.6226963 |
| H | 4.8384678  | 1.6138672  | -0.4889098 |
| H | -0.3997591 | 0.2505763  | -3.8122537 |
| H | 0.4301098  | 1.7302148  | -4.4152382 |
| H | 0.1978299  | 3.6177427  | -2.3242417 |
| H | -0.7049323 | 2.7788865  | -1.0137091 |
| C | -1.8090752 | 3.0821262  | -3.9558467 |
| H | -2.3650248 | 2.5413378  | -4.7295862 |
| H | -2.5182855 | 3.7171423  | -3.4124631 |
| H | -1.0667958 | 3.7351522  | -4.4536847 |
| C | 0.6769746  | -1.8467372 | -0.3685285 |
| O | 1.4700949  | -1.1888200 | -2.5401179 |
| C | 1.6746575  | -3.0324493 | -0.2963856 |
| N | 0.5270790  | -3.9656951 | -0.1768814 |
| C | -0.3873144 | -2.9292459 | -0.6904690 |
| H | 2.3641914  | -3.0333008 | 0.5518498  |
| H | 2.2224893  | -3.1258945 | -1.2423960 |
| H | -0.5600179 | -2.9864543 | -1.7756490 |
| H | -1.3512879 | -2.8443180 | -0.1747917 |
| C | 0.5965702  | -5.2189793 | -0.9009358 |
| H | -0.3536774 | -5.7550534 | -0.8010641 |
| H | 0.8090963  | -5.0817288 | -1.9785593 |
| H | 1.3847407  | -5.8463112 | -0.4712418 |
| C | -1.3748894 | 0.9154698  | 2.2057357  |
| O | -0.9411560 | 1.5316008  | 1.2431894  |
| N | -0.6046501 | 0.1441684  | 3.0274171  |
| C | 0.8421158  | 0.1419088  | 2.8971547  |
| C | 1.3100039  | -0.4371781 | 1.5546108  |
| O | 2.4364140  | -0.2009063 | 1.1187212  |
| N | 0.4183832  | -1.2316045 | 0.9194222  |
| O | -2.6785033 | 0.8648397  | 2.5749962  |
| C | -3.6246094 | 1.2470744  | 1.5199611  |
| C | 1.5285852  | 1.4611258  | 3.3440698  |
| N | 1.7297595  | 0.8728796  | 4.6902591  |
| C | 1.5283896  | -0.4801004 | 4.1433059  |
| H | -1.0227913 | -0.2029525 | 3.8773948  |
| H | -0.4829933 | -1.3761967 | 1.3494306  |
| H | 0.9105891  | 2.3620419  | 3.3155086  |
| H | 2.4630763  | 1.6165342  | 2.7888765  |
| H | 2.4633724  | -0.9839668 | 3.8536681  |
| H | 0.9239614  | -1.1574846 | 4.7600503  |
| C | 2.9813802  | 1.1470310  | 5.3675859  |
| H | 3.0297073  | 0.5738523  | 6.2994217  |
| H | 3.8649741  | 0.8918360  | 4.7518684  |
| H | 3.0326653  | 2.2107420  | 5.6214826  |
| H | -3.3284365 | 2.2143807  | 1.1103412  |
| H | -4.5688545 | 1.3462110  | 2.0586623  |
| C | -3.6917745 | 0.1907203  | 0.4505702  |
| C | -4.2496201 | -1.0638635 | 0.7357528  |
| H | -4.6529282 | -1.2588537 | 1.7266302  |
| C | -4.2900455 | -2.0574575 | -0.2409999 |
| H | -4.7276616 | -3.0250902 | -0.0117684 |
| C | -3.7744695 | -1.8054847 | -1.5159411 |
| H | -3.8052453 | -2.5806875 | -2.2765915 |
| C | -3.2184837 | -0.5600546 | -1.8063657 |
| H | -2.8033375 | -0.3460749 | -2.7860112 |
| C | -3.1771339 | 0.4323891  | -0.8271267 |
| H | -2.7297923 | 1.3885374  | -1.0745711 |

291  
292  
293  
294  
295  
296  
297  
298  
299  
300  
301  
302  
303  
304  
305  
306  
307  
308  
309  
310  
311  
312  
313  
314  
315  
316  
317  
318  
319  
320  
321  
322  
323  
324  
325  
326  
327  
328  
329  
330  
331  
332  
333  
334  
335  
336  
337  
338  
339  
340  
341  
342  
343  
344  
345  
346  
347  
348  
349  
350  
351  
352  
353  
354  
355  
356  
357  
358  
359  
360  
361  
362  
363  
364

### S1.2. Gas phase structure of the most stable helical conformation of compound 3

The most stable helical conformation of compound 3, the  $f^N\text{-}\pi_{\text{am}}^N\text{-}10^N\text{-}10$  ( $g^+$ ) structure, corresponds to an incipient  $3_{10}$ -helix and features three successive  $\delta$  motifs ( $\delta\text{-}\delta\text{-}\delta$ ). The structural analysis reveals, in addition to the two parallel C10 H-bonds, the occurrence of extra interactions between the Cbz phenyl ring and i) a  $\beta$ 2Ha atom of the second residue side chain and ii) the lone pair of the third residue azetidine N atom, as revealed by the short relevant interatomic distances ( $< 300$  pm) shown in Figure S1.2.

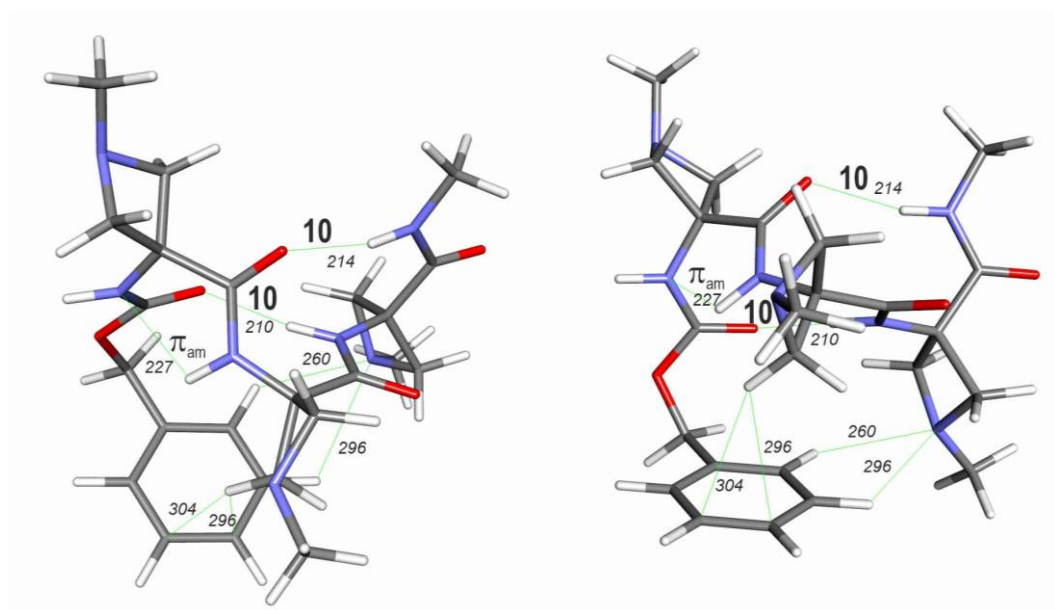

**Figure S1.2.** Two views of the quantum chemistry structure (RI-B97-D3 (BJ-abc)/def2-TZVPPD level) of the  $f^N\text{-}\pi_{\text{am}}^N\text{-}10^N\text{-}10$  ( $g^+$ ) conformation of compound 3, revealing the short dispersive interactions taking place between the Cbz moiety and the side chains of the second and third residues. The relevant interatomic distances are given in pm.

### S1.3. Temperature dependence of gas phase energetics of compound 3

The phenomenon of kinetic trapping (Figure S1.3) which can occur in a supersonic expansion, stems from the coexistence, in a given conformational population, of entropically favored (basin 1) and disfavored (basin 2) species, whose conformational basins are separated by high interconversion barriers, which can only be crossed during the early expansion, characterized by a high conformational temperature inherited from the vaporization process, whether thermal or by laser-desorption.

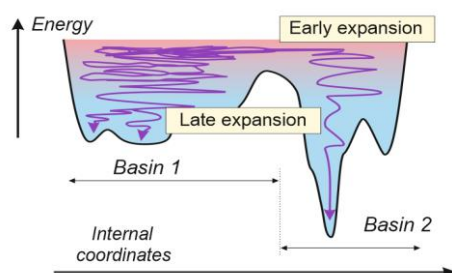

**Figure S1.3.** Sketch of the conformational population taking place in a supersonic expansion illustrating the phenomenon of kinetic trapping. The sudden drop in the interconversion rate as expansion develops leads to the trapping of the early conformational populations.

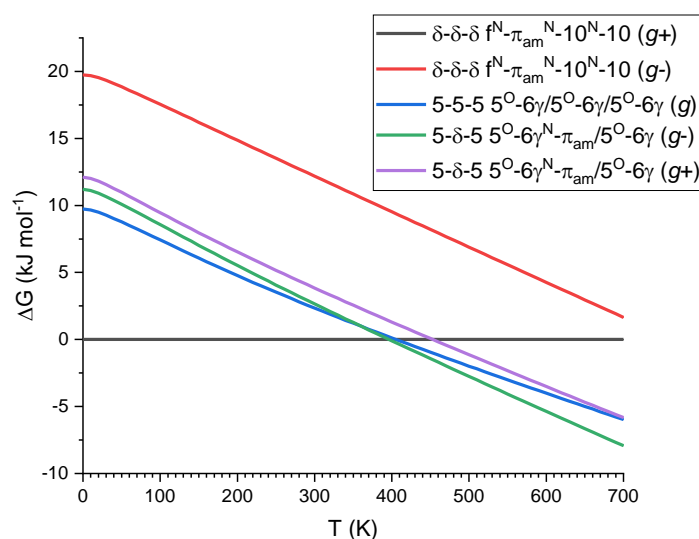

**Figure S1.4.** Temperature dependence of the stability of the most stable conformations of compound **3**, relative to the most stable helical form.

The analysis of the temperature dependence of the stability of the most stable conformations of compound **3** (Figure S1.4) shows that this species is fairly described by the sketch of Figure S1.3.

At high temperature, the compact helical  $f^N\text{-}\pi_{\text{am}}^N\text{-}10^N\text{-}10$  ( $g+$ ) conformation is less stable than its competitors. The reverse is true at low temperature. However, due to the high barrier between helical  $\delta\text{-}\delta\text{-}\delta$  backbones and extended (5-5-5) or semi-extended (5- $\delta$ -5) forms (typically illustrated by the two basins in Figure S1.3), interconversions are rapidly blocked in the expansion, freezing the conformation populations of each basin to that of the early expansion. Notwithstanding, further interconversion within each basin eventually provides additional conformational relaxation, leading *in fine* to a limited number of populated conformations. Such a kinetic trapping phenomenon hampers the most stable structure  $f^N\text{-}\pi_{\text{am}}^N\text{-}10^N\text{-}10$  ( $g+$ ) structure at low temperature but poorly populated in the early expansion to eventually funnel the population in the late expansion.

## S2. Gas phase spectroscopy of compound **3**

The gas phase IR spectroscopy of compound **3** was challenging for the IR/UV double resonance technique, because of the fragmentation processes taking place in the ion, and the observation of hybrid IR spectra.

A first IR/UV spectrum was obtained from the major UV band A (at  $37588\text{ cm}^{-1}$ ), by collecting the  $m/z = 458$  (Figure S2.1, top). It exhibited 3 features, the most red-shifted band exhibiting a prominent shoulder, suggesting 4 NH stretch bands as expected from the four NH stretches of the molecule. It was checked that the  $m/z$  501 parent channel exhibited the same IR depletions as those recorded on the  $m/z$  458 fragment channel, demonstrating that this fragmentation takes place after photoionization of **3**, rather than in neutral fragments formed during the laser desorption process.

In contrast, the IR/UV spectrum obtained from the UV band X (at  $37586\text{ cm}^{-1}$ ), by collecting the  $m/z = 458$  signal (Figure S2.1, center), exhibited 5 NH stretch bands, some of them being broad or doublet-like; among them four overlapped with IR bands obtained from the UV band A. Additionally, the maximum depopulation in this case was less than 50 %, in contrast to that obtained when probing on the A band. This suggested that, when using the X band with the UV laser, a mixture of two conformers was actually being probed, namely conformer A and a second one, which was labelled B. By subtracting the



(weighted) IR spectrum of A from that obtained from band X, the IR spectrum of B was obtained; it comprised four absorption IR bands as expected (Figure S2.1, bottom). The weight needed (0.60) suggested that B represents at best 40 % of the population probed at the UV band X, supporting the fact that i) B is a minor conformer (its population is much less than 40 %, taking into account the integrated UV line shapes assignable to B and A respectively) and ii) in addition to the major A band, conformer A also presents a minor UV absorption feature at 37586  $\text{cm}^{-1}$ , which might be a hot band resulting from insufficient cooling in the supersonic expansion for this large molecule. Finally, as for conformer A, it was found that the parent mass channel, when exciting the UV band X (at 37586  $\text{cm}^{-1}$ ), exhibited the same depopulations as the  $m/z$  458 mass channel, demonstrating that this UV band is due to **3** and not to a neutral formed in the laser-desorption process.

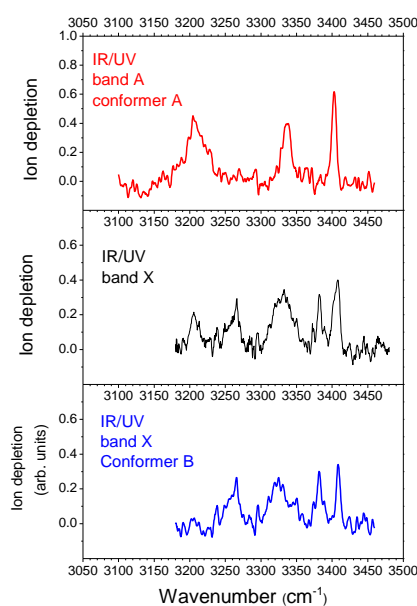

**Figure S2.1.** (*top and center*) IR/UV spectrum obtained by tuning the UV laser on the UV bands A and X, respectively, giving rise to the IR spectrum of conformer A (*top*) and to a hybrid spectrum (*center*), comprising contributions of A and of a second conformer labelled B; (*bottom*) Reconstructed IR spectrum of conformer B, by subtraction of a weighted contribution of A to the spectrum obtained from band X.

### S3. Solution phase modeling

#### S3.1 Relevant quantum chemistry conformations of compounds 1-3

Listed below, in a xyz format, are the most relevant solution phase structures of compounds 1-3, at the RI-B97-D3 (BJ-abc)/def2-TZVPPD + COSMO level of theory.

Compound 1: conformation 5<sup>O</sup>-6<sub>γ</sub> (g+)

|   |            |            |            |
|---|------------|------------|------------|
| C | -1.2600196 | -0.1401942 | 0.1044200  |
| O | -1.2080377 | -0.9975321 | -0.7676062 |
| N | -0.4088006 | -0.0109919 | 1.1510111  |
| C | 0.7160394  | -0.8549079 | 1.4288465  |
| C | 1.3659217  | -0.3185378 | 2.7227118  |
| O | 0.9047295  | 0.6637921  | 3.3177542  |
| N | 2.4501006  | -0.9948263 | 3.1370164  |
| O | -2.2141853 | 0.8391142  | 0.1699792  |
| C | -3.1281153 | 0.9270403  | -0.9671252 |
| C | 3.1863132  | -0.6287130 | 4.3364963  |
| C | 0.5299436  | -2.4046476 | 1.4539835  |
| N | 1.8461866  | -2.5340472 | 0.7782249  |
| C | 1.7618664  | -1.1294935 | 0.3032324  |
| H | -0.5479070 | 0.7450861  | 1.8121987  |
| H | 2.7462131  | -1.7878745 | 2.5717687  |
| H | 3.5803950  | 0.3897951  | 4.2572712  |
| H | 2.5422878  | -0.6792036 | 5.2204197  |
| H | 4.0162887  | -1.3257011 | 4.4573468  |
| H | -0.3097307 | -2.7034399 | 0.8160022  |
| H | 0.4616216  | -2.8893861 | 2.4327224  |
| H | 2.7015516  | -0.5697977 | 0.3376178  |
| H | 1.2963240  | -1.0405621 | -0.6852540 |
| C | 1.9843711  | -3.5740542 | -0.2284625 |
| H | 1.1978842  | -3.5117450 | -1.0009305 |
| H | 2.9606945  | -3.4842787 | -0.7157780 |
| H | 1.9278552  | -4.5572354 | 0.2498971  |
| H | -4.0480241 | 1.3254442  | -0.5362913 |
| H | -3.3052807 | -0.0780444 | -1.3534783 |
| C | -2.5849861 | 1.8425264  | -2.0306792 |
| C | -1.7864151 | 1.3422029  | -3.0678357 |
| H | -1.5717551 | 0.2788450  | -3.1069124 |
| C | -1.2642028 | 2.2019267  | -4.0351182 |
| H | -0.6469717 | 1.8038971  | -4.8360331 |
| C | -1.5361844 | 3.5711762  | -3.9770878 |
| H | -1.1311861 | 4.2398511  | -4.7317378 |
| C | -2.3349907 | 4.0776694  | -2.9491961 |
| H | -2.5548788 | 5.1407150  | -2.9030061 |
| C | -2.8553077 | 3.2161181  | -1.9824655 |
| H | -3.4796087 | 3.6100143  | -1.1839232 |

Compound 2: conformation f<sup>N</sup>- $\pi_{\text{am}}^{\text{N}}$ -10 (g+)

|   |            |            |            |
|---|------------|------------|------------|
| C | 1.0902569  | -0.1040711 | -2.2579089 |
| N | 0.6506365  | 1.1308624  | -1.9616388 |
| C | 0.6763305  | 2.2089438  | -2.9343053 |
| H | 0.2846739  | 1.3349881  | -1.0392516 |
| C | 0.9380458  | -1.1678272 | -1.1568892 |
| O | 1.5393733  | -0.4158412 | -3.3666357 |
| C | 1.9849954  | -2.3131593 | -1.1631591 |
| N | 0.8841400  | -3.3074540 | -1.0772391 |
| C | -0.0913414 | -2.2799265 | -1.4988071 |
| H | 2.6893836  | -2.3288272 | -0.3290072 |
| H | 2.5191783  | -2.3410844 | -2.1205859 |
| H | -0.3053317 | -2.2939393 | -2.5764089 |
| H | -1.0331712 | -2.2655407 | -0.9395226 |
| C | 0.9941159  | -4.4927659 | -1.9094483 |
| H | 0.0696874  | -5.0762035 | -1.8426600 |
| H | 1.1774034  | -4.2485402 | -2.9729452 |
| H | 1.8194855  | -5.1170115 | -1.5511921 |
| C | -1.0238343 | 1.5908186  | 1.5022846  |
| O | -0.5386073 | 2.2515667  | 0.5902988  |
| N | -0.3150109 | 0.7501031  | 2.2988875  |
| C | 1.1303284  | 0.6564508  | 2.2053714  |
| C | 1.6082356  | 0.0939481  | 0.8569974  |
| O | 2.7619504  | 0.2633020  | 0.4681398  |
| N | 0.6866593  | -0.6141497 | 0.1595156  |
| O | -2.3422236 | 1.5753940  | 1.8287377  |
| C | -3.2426076 | 2.0416543  | 0.7693413  |
| C | 1.8845732  | 1.9152252  | 2.7128824  |
| N | 2.0319801  | 1.2728617  | 4.0438134  |
| C | 1.7358491  | -0.0475906 | 3.4498276  |
| H | -0.7957329 | 0.2829162  | 3.0533016  |
| H | -0.2381861 | -0.7134773 | 0.5516144  |
| H | 1.3215429  | 2.8516349  | 2.7079259  |
| H | 2.8372389  | 2.0347170  | 2.1822439  |
| H | 2.6365025  | -0.6158153 | 3.1750757  |
| H | 1.0612985  | -0.6875507 | 4.0301192  |
| C | 3.3111335  | 1.4256486  | 4.7148809  |
| H | 3.3237182  | 0.8205394  | 5.6273712  |
| H | 4.1619583  | 1.1183821  | 4.0781823  |
| H | 3.4515199  | 2.4740597  | 4.9975022  |
| H | -2.9250203 | 3.0313432  | 0.4369249  |
| H | -4.2059512 | 2.1155906  | 1.2764143  |
| C | -3.2816330 | 1.0590451  | -0.3702584 |
| C | -3.7968227 | -0.2296464 | -0.1692665 |
| H | -4.1862529 | -0.5054197 | 0.8075651  |
| C | -3.8073234 | -1.1568602 | -1.2104984 |
| H | -4.2063965 | -2.1536120 | -1.0446057 |
| C | -3.3079671 | -0.8028325 | -2.4674983 |
| H | -3.3117060 | -1.5260234 | -3.2779505 |
| C | -2.7980757 | 0.4787172  | -2.6760923 |
| H | -2.4000022 | 0.7545262  | -3.6480873 |
| C | -2.7833624 | 1.4033462  | -1.6306458 |
| H | -2.3705014 | 2.3952382  | -1.7867056 |
| H | 0.3128323  | 3.1164306  | -2.4507990 |
| H | 0.0385030  | 1.9780544  | -3.7945355 |
| H | 1.6935312  | 2.3788614  | -3.3006708 |

Compound 2: conformation 5<sup>O</sup>-6<sup>γ</sup><sup>N</sup>-π<sub>am</sub> (g-)

|   |            |            |            |
|---|------------|------------|------------|
| C | 3.6125995  | 0.4416333  | 1.8095850  |
| N | 2.6758501  | 1.3076495  | 2.2460717  |
| C | 2.6202933  | 1.7660827  | 3.6254319  |
| H | 1.9318849  | 1.5579042  | 1.6140283  |
| C | 3.5324790  | 0.0699838  | 0.3217541  |
| O | 4.5271470  | 0.0218367  | 2.5229412  |
| C | 4.1906059  | -1.2754854 | -0.0859527 |
| N | 4.8950520  | -0.5798334 | -1.1934448 |
| C | 4.6399399  | 0.7252718  | -0.5495404 |
| H | 3.5124048  | -2.0735380 | -0.3954371 |
| H | 4.8661024  | -1.6292477 | 0.7030465  |
| H | 5.4739688  | 1.0741252  | 0.0765925  |
| H | 4.3244709  | 1.5296867  | -1.2239998 |
| C | 6.2816357  | -0.9412865 | -1.4285784 |
| H | 6.7107944  | -0.2803037 | -2.1894161 |
| H | 6.8993973  | -0.8695037 | -0.5137347 |
| H | 6.3333070  | -1.9697072 | -1.8008174 |
| C | -2.3870858 | -1.2124056 | -0.7991728 |
| O | -2.8775721 | -0.5299886 | -1.6875659 |
| N | -1.1193641 | -1.1217504 | -0.3246549 |
| C | -0.1005332 | -0.2411161 | -0.8099898 |
| C | 1.1627863  | -0.5153208 | 0.0331135  |
| O | 1.1875396  | -1.3878211 | 0.9036564  |
| N | 2.2187185  | 0.2776880  | -0.2600336 |
| O | -3.0481935 | -2.2076436 | -0.1324336 |
| C | -4.4892018 | -2.2792292 | -0.3559145 |
| C | 0.2270147  | -0.1899614 | -2.3360537 |
| N | 0.4071900  | 1.2775444  | -2.2017135 |
| C | -0.4001642 | 1.2831218  | -0.9564738 |
| H | -0.8280229 | -1.7438926 | 0.4212072  |
| H | 2.0985906  | 0.9173163  | -1.0475251 |
| H | -0.6538951 | -0.4623642 | -2.9295098 |
| H | 1.1088830  | -0.7363306 | -2.6851645 |
| H | -0.0381618 | 1.9533899  | -0.1693045 |
| H | -1.4685718 | 1.4495987  | -1.1354396 |
| C | -0.0321062 | 2.1195793  | -3.3018035 |
| H | -1.0824107 | 1.9271532  | -3.5811191 |
| H | 0.0670289  | 3.1722544  | -3.0181802 |
| H | 0.6015142  | 1.9378244  | -4.1756657 |
| H | -4.7363788 | -3.3132466 | -0.1081997 |
| H | -4.6980963 | -2.0933632 | -1.4107413 |
| C | -5.2245839 | -1.3110494 | 0.5315849  |
| C | -5.7885028 | -0.1426854 | 0.0072057  |
| H | -5.6996729 | 0.0606979  | -1.0558947 |
| C | -6.4513373 | 0.7601459  | 0.8414275  |
| H | -6.8873766 | 1.6632356  | 0.4232800  |
| C | -6.5506702 | 0.5042404  | 2.2104999  |
| H | -7.0647174 | 1.2067938  | 2.8606871  |
| C | -5.9897890 | -0.6604714 | 2.7425821  |
| H | -6.0686781 | -0.8661445 | 3.8065784  |
| C | -5.3337011 | -1.5629870 | 1.9060237  |
| H | -4.9003317 | -2.4701958 | 2.3199973  |
| H | 1.8246731  | 2.5070937  | 3.7134922  |
| H | 3.5719254  | 2.2208881  | 3.9147551  |
| H | 2.4153223  | 0.9341337  | 4.3079330  |

568  
569  
570  
571  
572  
573  
574  
575  
576  
577  
578  
579  
580  
581  
582  
583  
584  
585  
586  
587  
588  
589  
590  
591  
592  
593  
594  
595  
596  
597  
598  
599  
600  
601  
602  
603  
604  
605  
606  
607  
608  
609  
610  
611  
612  
613  
614  
615  
616  
617  
618  
619  
620  
621  
622  
623  
624  
625

Compound 2: conformation 5<sup>O</sup>-6 $\gamma$ /5<sup>O</sup>-6 $\gamma$  (g+)

|   |            |            |            |
|---|------------|------------|------------|
| C | 1.7579573  | -0.4611756 | -2.8207615 |
| C | 2.9451208  | -1.4362619 | -2.9699755 |
| O | 3.1876496  | -2.2917596 | -2.1110664 |
| N | 3.6738910  | -1.2768222 | -4.0888588 |
| C | 4.8307128  | -2.1045675 | -4.3902552 |
| C | 2.1565864  | 1.0191415  | -3.1122532 |
| N | 1.7228059  | 0.8186764  | -4.5183937 |
| C | 0.9037948  | -0.3546935 | -4.1225119 |
| H | 3.3883334  | -0.5406079 | -4.7296999 |
| H | 4.5469971  | -3.1588700 | -4.4726445 |
| H | 5.5894263  | -2.0146528 | -3.6059715 |
| H | 5.2543887  | -1.7721522 | -5.3386686 |
| H | 1.5138177  | 1.7127824  | -2.5590389 |
| H | 3.2095958  | 1.2892661  | -2.9864461 |
| H | 0.9394030  | -1.2001946 | -4.8164680 |
| H | -0.1344767 | -0.0945182 | -3.8882116 |
| C | 1.0420504  | 1.9219400  | -5.1767747 |
| H | 0.1767707  | 2.2842955  | -4.5945507 |
| H | 0.6897400  | 1.5987759  | -6.1616772 |
| H | 1.7413484  | 2.7523679  | -5.3176316 |
| C | -2.3255999 | -0.1554234 | 1.8105823  |
| O | -2.1306445 | -0.9966007 | 2.6773711  |
| N | -1.5872511 | 0.0302585  | 0.6899082  |
| C | -0.4475647 | -0.7429367 | 0.2918724  |
| C | 0.0244690  | -0.1660637 | -1.0641995 |
| O | -0.5723972 | 0.7790946  | -1.5931346 |
| N | 1.1069159  | -0.7800761 | -1.5807110 |
| O | -3.3553458 | 0.7487744  | 1.8288935  |
| C | -4.1609733 | 0.7827719  | 3.0465419  |
| C | -0.5404789 | -2.3008653 | 0.2776687  |
| N | 0.8402414  | -2.3416620 | 0.8103987  |
| C | 0.7269718  | -0.9487409 | 1.2983802  |
| H | -1.8492381 | 0.7645191  | 0.0413465  |
| H | 1.5177028  | -1.5555849 | -1.0503198 |
| H | -1.2940165 | -2.6495269 | 0.9940700  |
| H | -0.6772862 | -2.7899509 | -0.6923762 |
| H | 1.6232846  | -0.3348557 | 1.1613635  |
| H | 0.3679490  | -0.8764772 | 2.3325178  |
| C | 1.1874489  | -3.3817700 | 1.7590338  |
| H | 0.5073579  | -3.4053730 | 2.6296115  |
| H | 2.2088664  | -3.2202328 | 2.1188382  |
| H | 1.1512478  | -4.3562828 | 1.2613227  |
| H | -5.1371871 | 1.1316667  | 2.7054307  |
| H | -4.2469258 | -0.2310535 | 3.4407744  |
| C | -3.5718761 | 1.7232405  | 4.0630467  |
| C | -2.7102244 | 1.2508483  | 5.0613767  |
| H | -2.4777889 | 0.1912567  | 5.1040876  |
| C | -2.1478953 | 2.1328989  | 5.9853045  |
| H | -1.4820079 | 1.7560688  | 6.7569550  |
| C | -2.4411295 | 3.4972406  | 5.9204061  |
| H | -2.0046556 | 4.1834694  | 6.6409986  |
| C | -3.3015907 | 3.9766047  | 4.9296509  |
| H | -3.5376730 | 5.0359702  | 4.8785546  |
| C | -3.8629976 | 3.0925742  | 4.0076532  |
| H | -4.5356203 | 3.4652496  | 3.2386405  |

Compound 3: f<sup>N</sup>-π<sub>am</sub><sup>N</sup>-10<sup>N</sup>-10 (g<sup>+</sup>)

|   |            |            |            |
|---|------------|------------|------------|
| C | 0.9268573  | -0.8316267 | -1.4754473 |
| N | 0.4612320  | 0.4218692  | -1.2678330 |
| C | 0.6738438  | 1.4769036  | -2.2402173 |
| C | 2.1488627  | 1.8872690  | -2.3836502 |
| O | 2.5298981  | 2.5356291  | -3.3642720 |
| N | 2.9539391  | 1.5739867  | -1.3498045 |
| C | 4.3671513  | 1.9160137  | -1.3490878 |
| C | -0.1143042 | 1.2773643  | -3.5618095 |
| N | -1.1940880 | 2.1481509  | -3.0363179 |
| C | -0.2814982 | 2.6808788  | -2.0041887 |
| H | -0.0252370 | 0.6523290  | -0.4077334 |
| H | 2.6131350  | 0.9786517  | -0.6038176 |
| H | 4.8988293  | 1.4037398  | -2.1587652 |
| H | 4.5026571  | 2.9937973  | -1.4798938 |
| H | 4.7935540  | 1.6116077  | -0.3920933 |
| H | -0.4160740 | 0.2539346  | -3.7952901 |
| H | 0.4293623  | 1.7195888  | -4.4064550 |
| H | 0.2056434  | 3.6215182  | -2.2992535 |
| H | -0.7090460 | 2.7789305  | -1.0025353 |
| C | -1.7932522 | 3.0983335  | -3.9514381 |
| H | -2.3505388 | 2.5606534  | -4.7260633 |
| H | -2.4965904 | 3.7400403  | -3.4091604 |
| H | -1.0433931 | 3.7444255  | -4.4476191 |
| C | 0.6641640  | -1.8494327 | -0.3557946 |
| O | 1.5034742  | -1.1707611 | -2.5093439 |
| C | 1.6425764  | -3.0512671 | -0.2847225 |
| N | 0.4801306  | -3.9703608 | -0.1783374 |
| C | -0.4177796 | -2.9125496 | -0.6857756 |
| H | 2.3269040  | -3.0676872 | 0.5672708  |
| H | 2.1957525  | -3.1558932 | -1.2259850 |
| H | -0.5933043 | -2.9659772 | -1.7697965 |
| H | -1.3782869 | -2.8122426 | -0.1686359 |
| C | 0.5377257  | -5.2107676 | -0.9318486 |
| H | -0.4208869 | -5.7342609 | -0.8515588 |
| H | 0.7583579  | -5.0469921 | -2.0033860 |
| H | 1.3163304  | -5.8568798 | -0.5132377 |
| C | -1.3644452 | 0.9221302  | 2.1955392  |
| O | -0.9271971 | 1.5427704  | 1.2323597  |
| N | -0.5931658 | 0.1754771  | 3.0292678  |
| C | 0.8507074  | 0.1584777  | 2.8938378  |
| C | 1.3069324  | -0.4373104 | 1.5563902  |
| O | 2.4306756  | -0.2073511 | 1.1011679  |
| N | 0.4107162  | -1.2313405 | 0.9311380  |
| O | -2.6713027 | 0.8597551  | 2.5482573  |
| C | -3.6167729 | 1.2306362  | 1.4864099  |
| C | 1.5496333  | 1.4797046  | 3.3163667  |
| N | 1.7702052  | 0.9099690  | 4.6691890  |
| C | 1.5380965  | -0.4515243 | 4.1455675  |
| H | -1.0248829 | -0.2574580 | 3.8321855  |
| H | -0.4823648 | -1.3890897 | 1.3749327  |
| H | 0.9359025  | 2.3830486  | 3.2844316  |
| H | 2.4785703  | 1.6253971  | 2.7501768  |
| H | 2.4632028  | -0.9752672 | 3.8631227  |
| H | 0.9239301  | -1.1045361 | 4.7757089  |
| C | 3.0519558  | 1.1700079  | 5.3004456  |
| H | 3.1217769  | 0.6069265  | 6.2368487  |
| H | 3.9057302  | 0.8877931  | 4.6562403  |
| H | 3.1330064  | 2.2362848  | 5.5349793  |
| H | -3.3233703 | 2.1947652  | 1.0687028  |
| H | -4.5624738 | 1.3316289  | 2.0210951  |
| C | -3.6787530 | 0.1627647  | 0.4279978  |
| C | -4.2262364 | -1.0935082 | 0.7270218  |
| H | -4.6205847 | -1.2841200 | 1.7221777  |
| C | -4.2683524 | -2.0950985 | -0.2424803 |
| H | -4.6952520 | -3.0646940 | -0.0016208 |
| C | -3.7653406 | -1.8496517 | -1.5241311 |
| H | -3.7949662 | -2.6313619 | -2.2780976 |
| C | -3.2198789 | -0.6020166 | -1.8282110 |
| H | -2.8157676 | -0.3981411 | -2.8148686 |
| C | -3.1765059 | 0.3984705  | -0.8561942 |
| H | -2.7395299 | 1.3575448  | -1.1120567 |

684  
685  
686  
687  
688  
689  
690  
691  
692  
693  
694  
695  
696  
697  
698  
699  
700  
701  
702  
703  
704  
705  
706  
707  
708  
709  
710  
711  
712  
713  
714  
715  
716  
717  
718  
719  
720  
721  
722  
723  
724  
725  
726  
727  
728  
729  
730  
731  
732  
733  
734  
735  
736  
737  
738  
739  
740  
741  
742  
743  
744  
745  
746  
747  
748  
749  
750  
751  
752  
753  
754  
755  
756  
757  
758

Compound 3: 5<sup>O</sup>-6γ<sup>N</sup>-π<sub>am</sub>/5<sup>O</sup>-6γ (g+)

|   |            |            |            |
|---|------------|------------|------------|
| C | 0.3954439  | -0.4761050 | 3.1197104  |
| N | -0.3752126 | -1.4193154 | 2.5356067  |
| C | -0.3090802 | -2.8387195 | 2.7233243  |
| C | -1.3292777 | -3.4562227 | 1.7411058  |
| O | -1.9904511 | -2.7436688 | 0.9731206  |
| N | -1.4313171 | -4.7935750 | 1.7888763  |
| C | -2.3262070 | -5.5422654 | 0.9201139  |
| C | 1.0763713  | -3.5539364 | 2.6648941  |
| N | 0.6272824  | -4.4193445 | 3.7855184  |
| C | -0.4149941 | -3.4296834 | 4.1609394  |
| H | -1.0185453 | -1.1431029 | 1.7999959  |
| H | -0.8212305 | -5.2795908 | 2.4418286  |
| H | -3.3543115 | -5.1826756 | 1.0241931  |
| H | -2.0316427 | -5.4415631 | -0.1300495 |
| H | -2.2831783 | -6.5941018 | 1.2050792  |
| H | 1.8812169  | -2.8664203 | 2.9471611  |
| H | 1.3305576  | -4.0829045 | 1.7411628  |
| H | -1.3761418 | -3.8594777 | 4.4593982  |
| H | -0.0722679 | -2.7020420 | 4.9060912  |
| C | 1.6090435  | -4.7868761 | 4.7924567  |
| H | 2.1150859  | -3.9065969 | 5.2254619  |
| H | 1.1165737  | -5.3391687 | 5.5994061  |
| H | 2.3660737  | -5.4379628 | 4.3430300  |
| C | 0.0949689  | 0.9590399  | 2.6535113  |
| O | 1.2272068  | -0.6957373 | 4.0015120  |
| C | 1.2198207  | 2.0026799  | 2.8836250  |
| N | 0.2214982  | 2.9238953  | 3.4851018  |
| C | -0.7192904 | 1.8001981  | 3.6741198  |
| H | 1.7194470  | 2.3807010  | 1.9888536  |
| H | 1.9558068  | 1.6284003  | 3.6064039  |
| H | -0.6699154 | 1.3530243  | 4.6778968  |
| H | -1.7635930 | 2.0096743  | 3.4159275  |
| C | 0.6255260  | 3.6585806  | 4.6703233  |
| H | -0.2308925 | 4.2108359  | 5.0717787  |
| H | 1.0207695  | 2.9985453  | 5.4656489  |
| H | 1.4037734  | 4.3809459  | 4.4036474  |
| C | 0.0174402  | 0.5991183  | -3.4903139 |
| O | -1.0023717 | 1.0460434  | -3.9964664 |
| N | 0.2905090  | 0.5273622  | -2.1642506 |
| C | -0.5702902 | 0.9564529  | -1.1028758 |
| C | 0.1908880  | 0.7031437  | 0.2140688  |
| O | 1.3326939  | 0.2371581  | 0.2307563  |
| N | -0.4978035 | 1.0265483  | 1.3318798  |
| O | 1.0668003  | 0.0737522  | -4.1958557 |
| C | 1.0217497  | 0.2517015  | -5.6448042 |
| C | -1.1974351 | 2.3859233  | -1.1401353 |
| N | -2.4436578 | 1.8046677  | -0.5798273 |
| C | -2.0449039 | 0.4496446  | -1.0435544 |
| H | 1.1875686  | 0.1620638  | -1.8650360 |
| H | -1.4159727 | 1.4530163  | 1.1952276  |
| H | -1.3102952 | 2.7299660  | -2.1747910 |
| H | -0.7285067 | 3.1612642  | -0.5259474 |
| H | -2.2734415 | -0.3671801 | -0.3539811 |
| H | -2.4117590 | 0.2180340  | -2.0501991 |
| C | -3.7107678 | 2.3378674  | -1.0504417 |
| H | -3.7880317 | 2.3204090  | -2.1515501 |
| H | -4.5327048 | 1.7475044  | -0.6329000 |
| H | -3.8216218 | 3.3720644  | -0.7085967 |
| H | -0.0145154 | 0.1755022  | -5.9785393 |
| H | 1.5967763  | -0.5919868 | -6.0307176 |
| C | 1.6405702  | 1.5637099  | -6.0448421 |
| C | 3.0309528  | 1.6736955  | -6.1787291 |
| H | 3.6547422  | 0.7975962  | -6.0185267 |
| C | 3.6176669  | 2.8940522  | -6.5149099 |
| H | 4.6969223  | 2.9668747  | -6.6173839 |
| C | 2.8162864  | 4.0195182  | -6.7243372 |
| H | 3.2712242  | 4.9702178  | -6.9885338 |
| C | 1.4288193  | 3.9176582  | -6.5976464 |
| H | 0.8019848  | 4.7895626  | -6.7634690 |
| C | 0.8444687  | 2.6958862  | -6.2590589 |
| H | -0.2329020 | 2.6157230  | -6.1504870 |

759  
760  
761  
762  
763  
764  
765  
766  
767  
768  
769  
770  
771  
772  
773  
774  
775  
776  
777  
778  
779  
780  
781  
782  
783  
784  
785  
786  
787  
788  
789  
790  
791  
792  
793  
794  
795  
796  
797  
798  
799  
800  
801  
802  
803  
804  
805  
806  
807  
808  
809  
810  
811  
812  
813  
814  
815  
816  
817  
818  
819  
820  
821  
822  
823  
824  
825  
826  
827  
828  
829  
830  
831  
832

## S3.2. Solution phase IR spectra and theoretical modeling

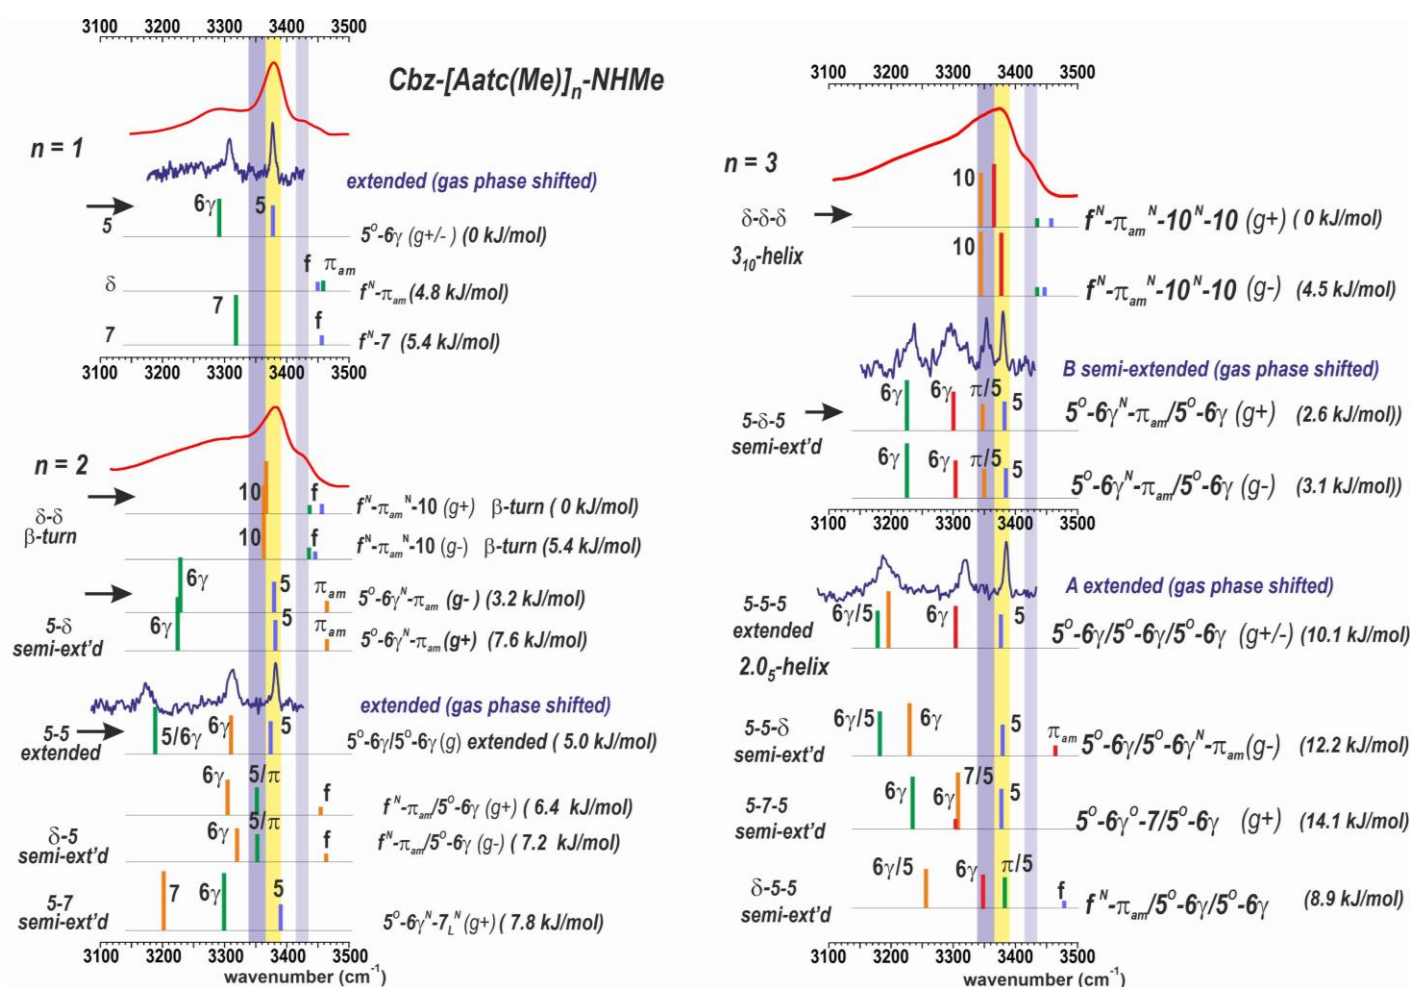

**Figure S3.1.** Solution state IR spectra (red traces) of compounds 1-3 (5 mM in chloroform) and calculated IR spectra (colored vertical bars) of stable conformations of each relevant conformational family (at 300 K; energetics in kJ·mol<sup>-1</sup> between parentheses). The NH stretches are localized in each residue and the residue position from N to C terminus is rainbow color-coded from blue to red. The colored spectral regions indicate the typical locations of diagnostic spectral features: nearly free ( $\pi_{am}$ ) NH in a  $\delta$  conformation (lilac), NH engaged in a C5 H-bond (yellow) or in a C10 H-bond (mauve). The spectrum of 1 is adapted from Ref. [40]. Experimental gas phase spectra of isolated conformations are also reproduced (blue traces); a fair match with their solution counterparts is found, providing a 25 cm<sup>-1</sup> red-shift is applied, which therefore constitutes the major spectroscopic effect of solvation. The arrows indicate the conformations that contribute to the solution spectrum.

The comparison between experimental IR absorption spectra and quantum chemistry solution modeling (Figure S3.1) provides interesting observations:

- i) the bands of H-bonded NHs are fairly well reproduced by theory.
- ii) in contrast, the free or nearly free NHs ( $\pi_{am}$ ) bands are more challenging since overestimated by theory by typically 25 cm<sup>-1</sup>.
- iii) the experimental gas phase spectra observed, once red-shifted by 25 cm<sup>-1</sup>, are found to fairly match the IR spectra predicted in solution for these conformations, suggesting that solution leads mainly to a red-shift of ca. 25 cm<sup>-1</sup> compared to its isolated counterpart.



## 857

## 858

859

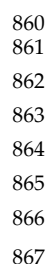

**Figure S4.1.** Theoretical landscapes of Cbz-(Attc)<sub>n</sub>-NHMe compounds in a chloroform solution at 300 K as obtained at the DFT-D level of theory with a solution modelling by a polarizable continuum (RI-B97D3(BJ-abc)/TZVPPD + COSMO model). Same detail captions as Figure 4. Here the absence of superscript on the first residues indicates a planar heterocyclic ring found at this level of theory.

## S4.2. IR in solution: experiment and theoretical modeling

**Cbz-[Attc]<sub>n</sub>-NHMe**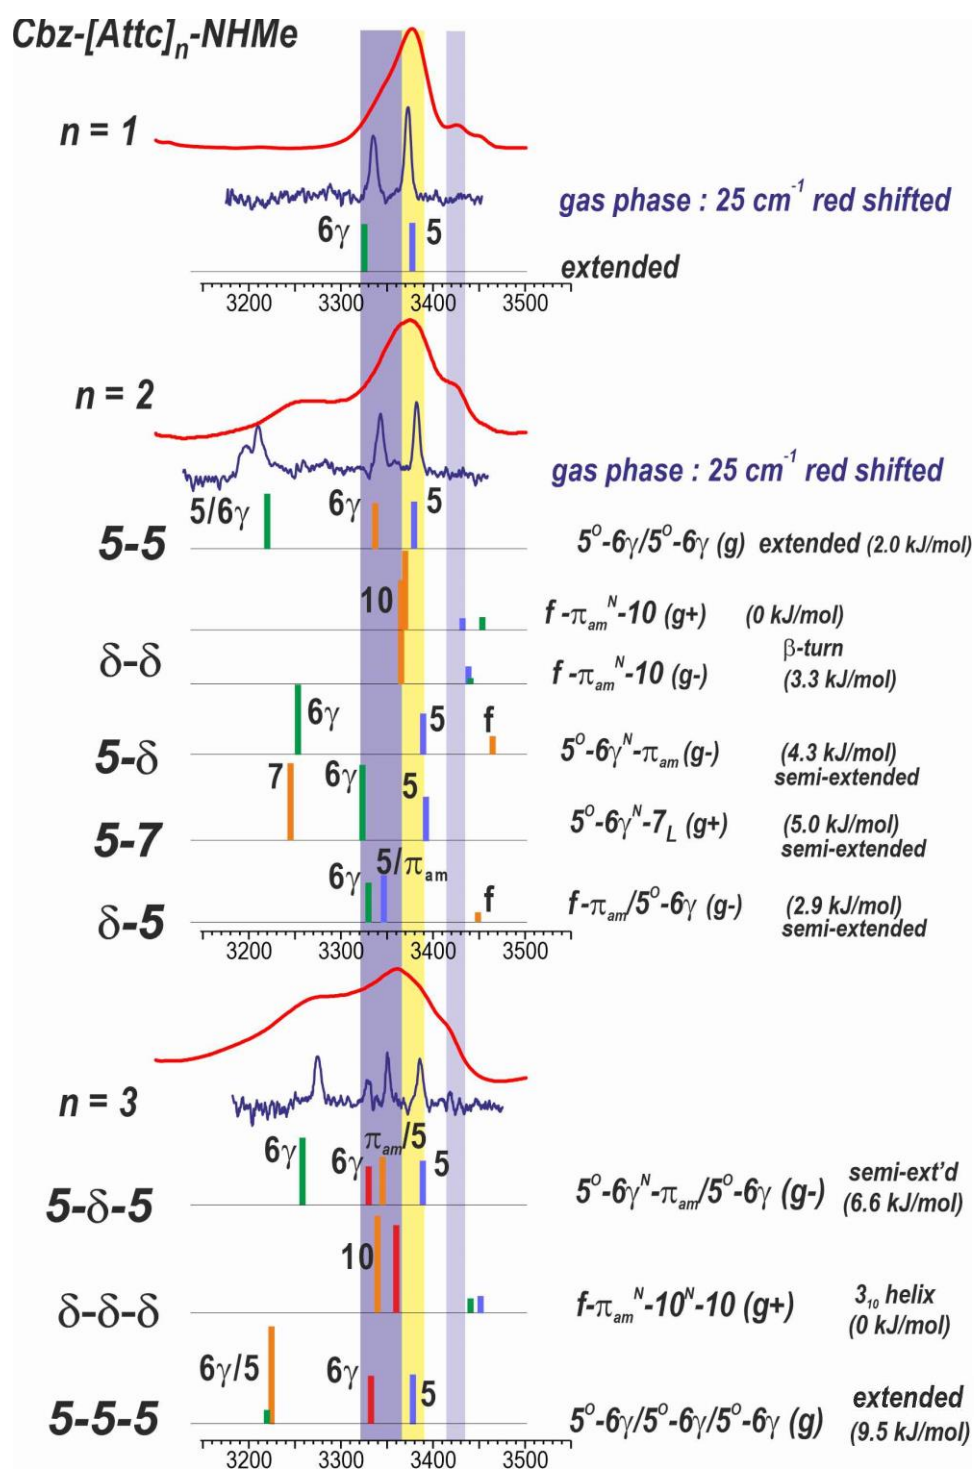

**Figure S4.2.** Solution state IR spectra of Cbz-(Attc)<sub>n</sub>-NHMe derivatives (*n* = 1-3), the counterparts of compounds 1-3 (5 mM in chloroform, adapted from Ref. [36]) and the calculated IR spectra of their most energetically relevant conformations at the same level of theory. The colored zones indicate the typical locations of diagnostic spectral features: nearly free ( $\pi_{am}$ ) NH in a  $\delta$  conformation (lilac), NH engaged in a C5 H-bond (yellow) or in a C10 H-bond (mauve).

## S5. Solution phase spectroscopy of compounds 1-3

## S5.1 IR spectroscopy dilution experiments

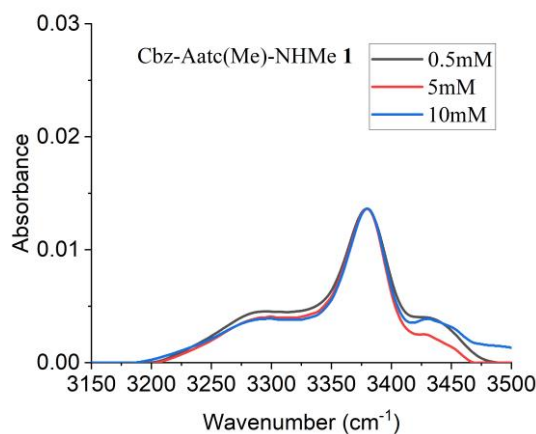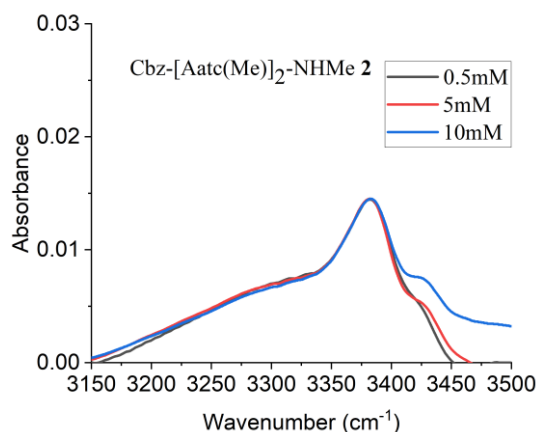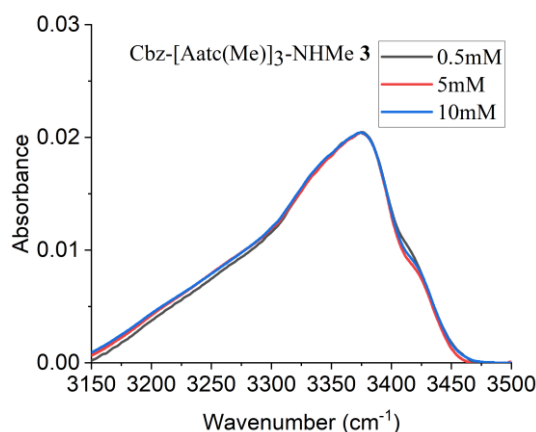

**Figure S5.1.** Infrared spectra of 1-3 were recorded in chloroform at three different concentrations (0.5 mM, 5 mM, and 10 mM). For each compound, the concentration is indicated by color (black, red, and blue, respectively). No significant concentration effects were noted, indicating that non-covalent interactions (hydrogen bonds) were intramolecular in nature.

S5.2  $^1\text{H}$  NMR chemical shifts of NH signals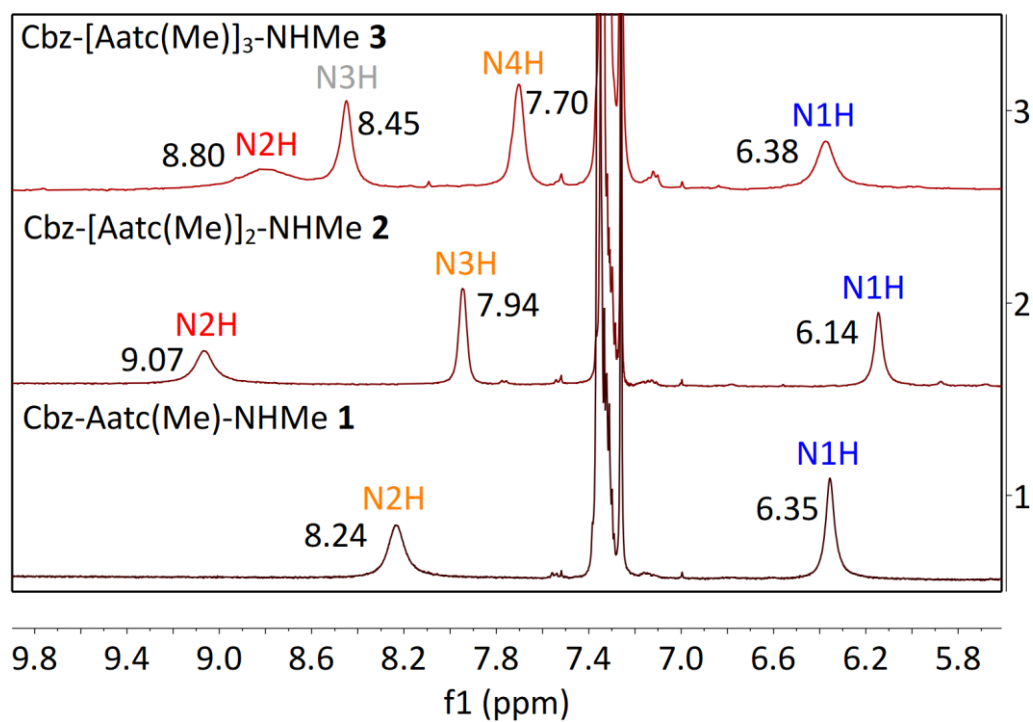

**Figure S5.2.**  $^1\text{H}$  NMR spectra (300 K, 20 mM solutions in  $\text{CDCl}_3$ ) of compounds 1-3 in the spectral window where the NH proton signals are located.

**S5.3  $^1\text{H}$  NMR DMSO- $d_6$  titration experiments**

$^1\text{H}$  spectra were recorded at 300 K. Starting samples were prepared in  $\text{CDCl}_3$  (400  $\mu\text{L}$ ) to give solutions at a concentration of 5 mM. Aliquots of DMSO- $d_6$  ( $6 \times 2 \mu\text{L}$ ,  $2 \times 4 \mu\text{L}$ ,  $2 \times 10 \mu\text{L}$ ) were added successively to the NMR tube followed, after each addition, by rapid agitation then re-recording of the  $^1\text{H}$  NMR spectra.

Cbz-Aatc(Me)-NHMe **1**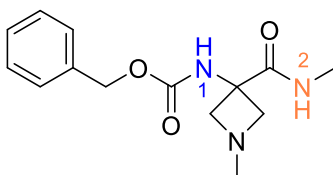

|                    | DMSO- $d_6$ (% , v/v) |      |      |      |      |      |      |      |      |      |      | $\Delta\delta$ |
|--------------------|-----------------------|------|------|------|------|------|------|------|------|------|------|----------------|
|                    | 0                     | 0.5  | 1    | 1.5  | 2    | 2.5  | 3    | 4    | 5    | 7.5  | 10   |                |
| $\delta\text{N1H}$ | 6.33                  | 6.36 | 6.38 | 6.40 | 6.42 | 6.44 | 6.47 | 6.49 | 6.52 | 6.57 | 6.62 | 0.29           |
| $\delta\text{N2H}$ | 8.24                  | 8.21 | 8.18 | 8.16 | 8.13 | 8.10 | 8.06 | 8.02 | 7.99 | 7.90 | 7.82 | -0.42          |

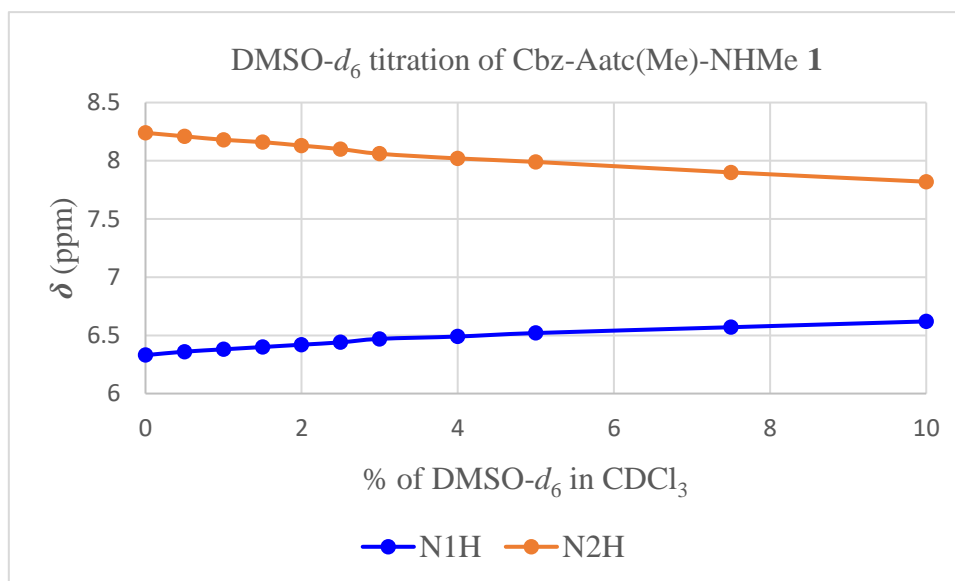

Cbz-[Aatc(Me)]<sub>2</sub>-NHMe **2**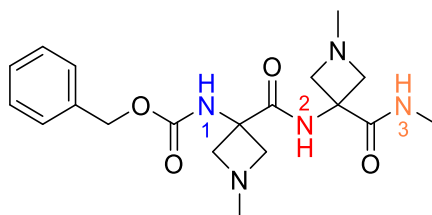

|              | DMSO- <i>d</i> <sub>6</sub> (% v/v) |      |      |      |      |      |      |      |      |      |      | $\Delta\delta$ |
|--------------|-------------------------------------|------|------|------|------|------|------|------|------|------|------|----------------|
|              | 0                                   | 0.5  | 1    | 1.5  | 2    | 2.5  | 3    | 4    | 5    | 7.5  | 10   |                |
| $\delta$ N1H | 6.12                                | 6.16 | 6.20 | 6.23 | 6.27 | 6.30 | 6.34 | 6.40 | 6.46 | 6.59 | 6.70 | 0.58           |
| $\delta$ N2H | 9.10                                | 9.06 | 9.02 | 8.98 | 8.94 | 8.90 | 8.86 | 8.79 | 8.73 | 8.59 | 8.48 | −0.62          |
| $\delta$ N3H | 7.96                                | 7.95 | 7.93 | 7.91 | 7.89 | 7.87 | 7.86 | 7.82 | 7.79 | 7.71 | 7.63 | −0.33          |

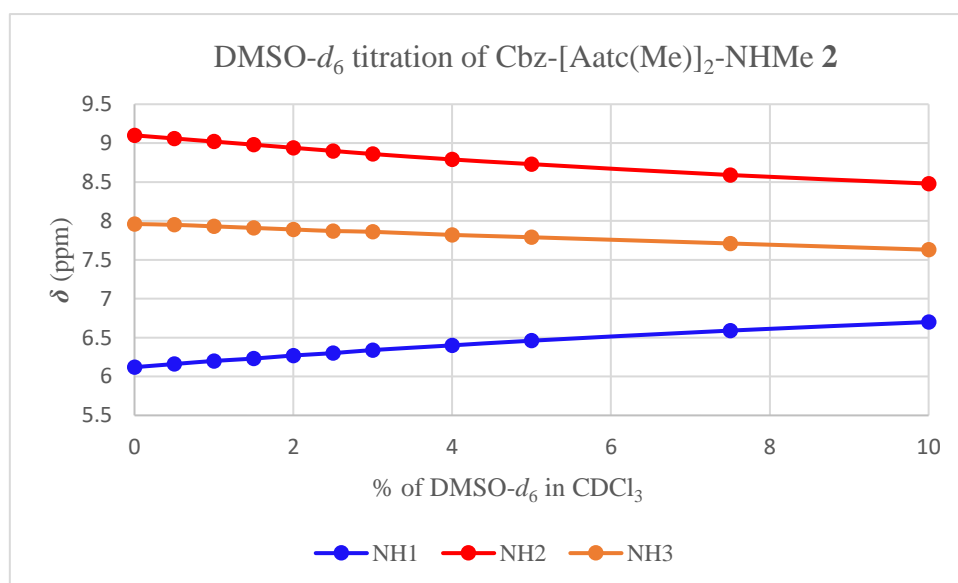

Cbz-[Aatc(Me)]<sub>3</sub>-NHMe **3**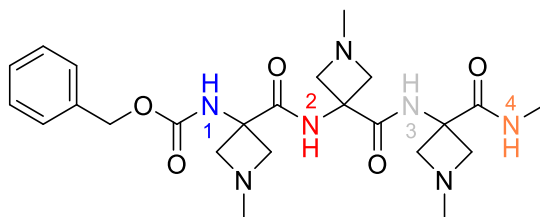

|              | DMSO- <i>d</i> <sub>6</sub> (% v/v) |      |      |      |      |      |      |      |      |      |      | $\Delta\delta$ |
|--------------|-------------------------------------|------|------|------|------|------|------|------|------|------|------|----------------|
|              | 0                                   | 0.5  | 1    | 1.5  | 2    | 2.5  | 3    | 4    | 5    | 7.5  | 10   |                |
| $\delta$ N1H | 6.22                                | 6.32 | 6.41 | 6.51 | 6.59 | 6.66 | 6.73 | 6.84 | 6.94 | 7.13 | 7.17 | 0.95           |
| $\delta$ N2H | 8.85                                | 8.80 | 8.73 | 8.68 | 8.63 | 8.58 | 8.55 | 8.49 | 8.44 | 8.38 | 8.34 | -0.51          |
| $\delta$ N3H | 8.48                                | 8.43 | 8.38 | 8.33 | 8.29 | 8.25 | 8.21 | 8.15 | 8.09 | 7.98 | 7.90 | -0.58          |
| $\delta$ N4H | 7.79                                | 7.75 | 7.70 | 7.65 | 7.60 | 7.56 | 7.52 | 7.45 | 7.40 | 7.27 | 7.19 | -0.60          |

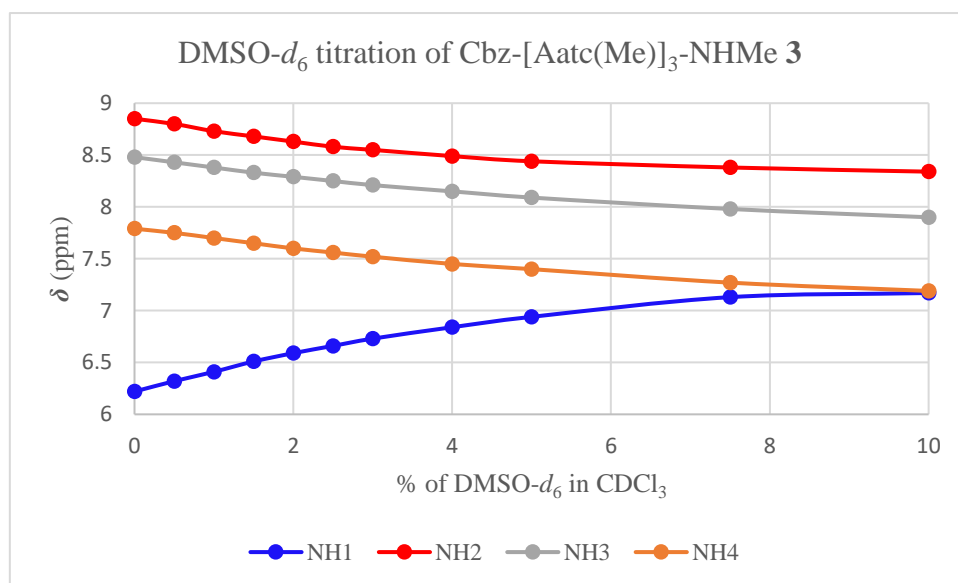

Supplement: s1 [file s1]
